# Supplementary material
Source: PubMed Central journal article supplement (PMC3931135)
Supplement: NIHMS418394-supplement-01.pdf [file NIHMS418394-supplement-01.pdf]

Table S1. Mutations in *p53* treated with benzo[a]pyrene-7,8-dione (BPQ) in wild type (*yIG397*) yeast

| Colony  | Treatment | Codon | Base | Wild type   | Mutant       | Change | Wild AA | Mut AA |
|---------|-----------|-------|------|-------------|--------------|--------|---------|--------|
| WT 6    | BPQ       | 178   | 534  | CCC-CAC-CAT | CCC-CAT*-CAT | C>T    | H       | H      |
| WT 9A   | BPQ       | 151   | 452  | ACA-CCC-CCG | ACA-CG*C-CCG | C>G    | P       | R      |
| WT 9B   | BPQ       | 219   | 655  | GTG-CCC-TAT | GTG-T*CC-TAT | C>T    | P       | S      |
| WT 11   | BPQ       | 173   | 517  | GTT-GTG-AGG | GTT-C*TG-AGG | G>C    | V       | L      |
| WT 14   | BPQ       | 205   | 614  | GAG-TAT-TTG | GAG-TG*T-TTG | A>G    | Y       | C      |
| WT 17   | BPQ       | 153   | 457  | CCG-CCC-GGC | CCG-T*CC-GGC | C>T    | P       | S      |
| WT 18A  | BPQ       | 253   | 758  | CTC-ACC-ATC | CTC-AA*A-ATC | C>A    | T       | K      |
| WT 18   | BPQ       | 253   | 759  | CTC-ACC-ATC | CTC-AAA*-ATC | C>A    | T       | K      |
| WT 19   | BPQ       | 389   | 1165 | GAA-GGG-CCT | GAA-A*GG-CCT | G>A    | G       | R      |
| WT 25   | BPQ       | 75    | 224  | GCC-CCT-GCA | GCC-CG*T-GCA | C>G    | P       | R      |
| WT 1P   | BPQ       | 276   | 827  | TGT-GCC-TGT | TGT-GT*C-TGT | C>T    | A       | V      |
| WT 2P   | BPQ       | 236   | 706  | AAC-TAC-ATG | AAC-C*AC-ATG | T>C    | Y       | H      |
| WT 3P   | BPQ       | 234   | 701  | CAC-TAC-AAC | CAC-TC*C-AAC | A>C    | Y       | S      |
| WT 12P  | BPQ       | 190   | 569  | GCC-CCT-CCT | GCC-CT*T-CCT | C>T    | P       | L      |
| WT 19P  | BPQ       | 146   | 438  | CTG-TGG-GTT | CTG-TGA*-GTT | G>A    | W       | Stop   |
| WT 20P  | BPQ       | 246   | 737  | GGC-ATG-AAC | GGC-AG*G-AAC | T>G    | M       | R      |
| WT 21P  | BPQ       | 277   | 830  | GCC-TGT-CCT | GCC-TA*T-CCT | G>A    | C       | Y      |
| WT 23P  | BPQ       | 155   | 464  | GGC-ACC-CGC | GGC-AT*C-CGC | C>T    | T       | I      |
| WT 24AP | BPQ       | 219   | 656  | GTG-CCC-TAT | GTG-CA*C-TAT | C>A    | P       | H      |
| WT 24BP | BPQ       | 226   | 676  | GTT-GGC-TCT | GTT-A*GC-TCT | G>A    | G       | S      |
| WT 25P  | BPQ       | 317   | 949  | CCC-CAG-CCA | CCC-T*AG-CCA | C>T    | Q       | Stop   |
| WT 31P  | BPQ       | 190   | 569  | GCC-CCT-CCT | GCC-CT*T-CCT | C>T    | P       | L      |
| WT 39P  | BPQ       | 158   | 473  | GTC-CGC-GCC | GTC-CA*C-GCC | G>A    | R       | H      |
| WT 23Z  | BPQ       | 283   | 847  | CGG-CGC-ACA | CGG-A*GC-ACA | C>A    | R       | S      |
| WT 26Z  | BPQ       | 156   | 466  | ACC-CGC-GTC | ACC-T*GC-GTC | C>T    | R       | C      |
| WT 27Z  | BPQ       | 325   | 973  | GAT-GGA-GAA | GAT-T*GA-GAA | G>T    | G       | Stop   |
| WT 28Z  | BPQ       | 271   | 813  | TTT-GAG-GTG | TTT-GAT*-GTG | G>T    | E       | D      |
| WT 30Z  | BPQ       | 182   | 546  | CGC-TGC-TCA | CGC-TGA*-TCA | C>A    | C       | Stop   |
| WT 33Z  | BPQ       | 326   | 973  | GGA-GAA-TAT | GGA-T*AA-TAT | G>T    | E       | Stop   |
| WT 35Z  | BPQ       | 202   | 605  | TTG-CGT-GTG | TTG-CC*T-GTG | G>C    | R       | P      |
| WT 36Z  | BPQ       | 177   | 529  | TGC-CCC-CAC | TGC-A*CC-CAC | C>A    | P       | T      |
| WT 38Z  | BPQ       | 276   | 826  | TGT-GCC-TGT | TGT-T*CC-TGT | G>T    | A       | S      |
| WT 39Z  | BPQ       | 151   | 452  | ACA-CCC-CCG | ACA-CA*C-CCG | C>A    | P       | H      |
| WT 41Z  | BPQ       | 276   | 827  | TGT-GCC-TGT | TGC-GG*C-TGT | C>G    | A       | G      |
| WT 42Z  | BPQ       | 191   | 572  | CCT-CCT-CAG | CCT-CA*T-CAG | C>A    | P       | S      |
| WT 43Z  | BPQ       | 317   | 949  | CCC-CAG-CCA | CCC-T*AG-CCA | C>T    | Q       | Stop   |
| WT 45Z  | BPQ       | 170   | 509  | ATG-ACG-GAG | ATG-AT*G-GAG | C>T    | T       | M      |
| WT 47Z  | BPQ       | 170   | 509  | ATG-ACG-GAG | ATG-AT*G-GAG | C>T    | T       | M      |
| WT 50Z  | BPQ       | 216   | 647  | AGT-GTG-GTG | AGT-GA*G-GTG | T>A    | V       | E      |
| WT 61Z  | BPQ       | 283   | 847  | CGG-CGC-ACA | CGG-A*GC-ACA | C>A    | R       | S      |
| WT 62Z  | BPQ       | 180   | 538  | CAT-GAG-CGC | CAT-T*AG-CGC | G>T    | E       | stop   |
| WT 63Z  | BPQ       | 250   | 749  | AGG-CCC-ATC | AGG-CT*C-ATC | C>T    | P       | L      |
| WT 64Z  | BPQ       | 213   | 638  | TTT-CGA-CAT | TTT-CT*A-CAT | G>T    | R       | L      |

| Colony  | Treatment | Codon | Base | Wild type   | Mutant       | Change | Wild AA | Mut AA |
|---------|-----------|-------|------|-------------|--------------|--------|---------|--------|
| WT 65Z  | BPQ       | 283   | 847  | CGG-CGC-ACA | CGG-T*GC-ACA | C>T    | R       | C      |
| WT 67ZA | BPQ       | 241   | 722  | AGT-TCC-TCG | AGT-TA*C-TCG | C>A    | S       | Y      |
| WT 67ZB | BPQ       | 314   | 941  | AGC-TCC-TCT | AGC-TT*C-TCT | C>T    | S       | F      |
| WT 68Z  | BPQ       | 105   | 314  | CAG-GGC-AGC | CAG-GT*C-AGC | G>T    | G       | V      |
| WT 73Z  | BPQ       | 143   | 428  | CCT-GTG-CAG | CCT-GC*G-CAG | T>C    | V       | A      |
| WT 74Z  | BPQ       | 158   | 472  | GTC-CGC-GCC | GTC-T*GC-GCC | C>T    | R       | C      |
| WT 75Z  | BPQ       | 267   | 799  | GGA-CGG-AAC | GGA-T*GG-ACC | C>T    | R       | W      |
