# Supplementary material
Source: PubMed Central journal article supplement (PMC3931135)
Supplement: NIHMS418394-supplement-02.pdf [file NIHMS418394-supplement-02.pdf]

Table S2. Mutations in *p53* treated with benzo[a]pyrene-7,8-dione (BPQ) in OGG1 KO (*ogg1*) yeast

| Colony    | Treatment | Codon | Base | Wild type   | Mutant       | Change | Wild AA | Mut AA |
|-----------|-----------|-------|------|-------------|--------------|--------|---------|--------|
| OGG1 1A   | BPQ       | 180   | 540  | CAC-CAT-GAG | CAC-CAT-T*AG | G>T    | E       | D      |
| OGG1 1B   | BPQ       | 181   | 541  | CAT-GAG-CGC | CAT-GAG-T*CG | C>T    | R       | C      |
| OGG1 2A   | BPQ       | 131   | 393  | GCC-CTC-AAC | GCC-CTC-AAA* | C>A    | N       | K      |
| OGG1 2B   | BPQ       | 161   | 482  | ATG-GCC-ATC | ATG-GA*C-ATC | C>A    | A       | D      |
| OGG1 3    | BPQ       | 135   | 404  | TTT-TGC-CAA | TTT-TT*C-CAA | G>T    | C       | F      |
| OGG1 4    | BPQ       | 161   | 482  | ATG-GCC-ATC | ATG-GA*C-ATC | C>A    | A       | D      |
| OGG1 5    | BPQ       | 283   | 848  | CGG-CGC-ACA | CGG-CA*C-ACA | G>A    | R       | H      |
| OGG1 6    | BPQ       | 130   | 389  | GCC-CTC-AAC | GCC-CC*C-AAC | T>C    | L       | P      |
| OGG1 8    | BPQ       | 176   | 527  | CGC-TGC-CCC | CGC-TA*C-CCC | G>A    | C       | Y      |
| OGG1 10   | BPQ       | 242   | 726  | TCC-TGC-ATG | TCC-TGA*-ATG | C>A    | C       | Stop   |
| OGG1 12   | BPQ       | 287   | 859  | GAA-GAG-AAT | GAA-T*AG-AAT | G>T    | E       | Stop   |
| OGG1 13   | BPQ       | 287   | 859  | GAA-GAG-AAT | GAA-T*AG-AAT | G>T    | E       | Stop   |
| OGG1 16   | BPQ       | 165   | 493  | AAG-CAG-TCA | AAG-T*AG-TCA | C>T    | Q       | Stop   |
| OGG1 19   | BPQ       | 242   | 726  | TCC-TGC-ATG | TCC-TGA*-ATG | C>A    | C       | Stop   |
| OGG1 20   | BPQ       | 242   | 726  | TCC-TGC-ATG | TCC-TGA*-ATG | C>A    | C       | Stop   |
| OGG1 23   | BPQ       | 287   | 859  | GAA-GAG-AAT | GAA-T*AG-AAT | G>T    | E       | Stop   |
| OGG1 25   | BPQ       | 280   | 839  | GGG-AGA-GAC | GGG-AT*A-GAC | G>T    | R       | I      |
| OGG1 27   | BPQ       | 242   | 726  | TCC-TGC-ATG | TCC-TGA*-ATG | C>A    | C       | Stop   |
| OGG1 28   | BPQ       | 294   | 880  | GGG-GAG-CCT | GGG-T*AG-CCT | G>T    | E       | Stop   |
| OGG1 29A  | BPQ       | 241   | 722  | TCC-TGC-ATG | TA*C-TCG-ATG | C>A    | S       | Y      |
| OGG1 29B  | BPQ       | 162   | 486  | GCC-ATC-TAC | GCC-ATA*-TAC | C>A    | I       | I      |
| OGG1 30   | BPQ       | 161   | 482  | ATG-GCC-ATC | ATG-GA*C-ATC | C>A    | A       | D      |
| OGG1 31   | BPQ       | 246   | 736  | GGC-ATG-AAC | GGC-G*TG-AAC | A>G    | M       | V      |
| OGG1 25Z  | BPQ       | 250   | 749  | AGG-CCC-ATC | AGG-CT*C-ATC | C>T    | P       | L      |
| OGG1 26Z  | BPQ       | 250   | 749  | AGG-CCC-ATC | AGG-CT*C-ATC | C>T    | P       | L      |
| OGG1 27Z  | BPQ       | 250   | 749  | AGG-CCC-ATC | AGG-CT*C-ATC | C>T    | P       | L      |
| OGG1 30Z  | BPQ       | 250   | 749  | AGG-CCC-ATC | AGG-CT*C-ATC | C>T    | P       | L      |
| OGG1 33ZA | BPQ       | 272   | 816  | GAG-GTG-CGT | GAG-A*TG-CGT | G>A    | V       | V      |
| OGG1 33ZB | BPQ       | 273   | 818  | GAG-GTG-CGT | GAG-GTA*-CGT | G>A    | R       | H      |
| OGG1 35Z  | BPQ       | 306   | 916  | AAG-CGA-GCA | AAG-A*GA-GCA | C>A    | R       | R      |
| OGG1 36Z  | BPQ       | 183   | 548  | TGC-TCA-GAT | TGC-TA*A-GAT | C>A    | S       | Stop   |
| OGG1 37Z  | BPQ       | 177   | 529  | TGC-CCC-CAC | TGC-A*CC-CAC | C>A    | P       | T      |
| OGG1 38ZA | BPQ       | 154   | 460  | CCC-GGC-ACC | CCC-T*GC-ACC | G>T    | G       | C      |
| OGG1 38ZB | BPQ       | 162   | 484  | GCC-ATC-TAC | GCC-T*TC-TAC | A>T    | I       | F      |
| OGG1 39Z  | BPQ       | 276   | 826  | TGT-GCC-TGT | TGT-A*CC-TGT | G>A    | A       | T      |
| OGG1 40Z  | BPQ       | 179   | 535  | CAC-CAT-GAG | CAC-A*AT-GAG | C>A    | H       | N      |
| OGG1 41Z  | BPQ       | 250   | 749  | AGG-CCC-ATC | AGG-CT*C-ATC | C>T    | P       | L      |
| OGG1 44Z  | BPQ       | 298   | 892  | CAC-GAG-CTG | CAC-T*AG-CTG | G>T    | E       | stop   |
| OGG1 45Z  | BPQ       | 279   | 835  | CCT-GGG-AGA | CCT-T*GG-AGA | G>T    | G       | W      |
| OGG1 46Z  | BPQ       | 250   | 749  | AGG-CCC-ATC | AGG-CT*C-ATC | C>T    | P       | L      |
| OGG1 48Z  | BPQ       | 222   | 664  | GAG-CCG-CCT | GAG-T*CG-CCT | C>T    | P       | S      |
| OGG1 51Z  | BPQ       | 250   | 749  | AGG-CCC-ATC | AGG-CT*C-ATC | C>T    | P       | L      |
| OGG1 53Z  | BPQ       | 266   | 797  | CTG-GGA-CGG | CTG-GA*A-CGG | G>A    | G       | E      |
| OGG1 54Z  | BPQ       | 250   | 749  | AGG-CCC-ATC | AGG-CT*C-ATC | C>T    | P       | L      |
| OGG1 55Z  | BPQ       | 336   | 1006 | CGT-GAG-CGC | CGT-T*AG-CGC | G>T    | E       | Stop   |
| OGG1 56Z  | BPQ       | 282   | 844  | GAC-CGG-CGC | GAC-A*GG-CGC | C>A    | R       | R      |
| OGG1 57Z  | BPQ       | 111   | 333  | CGT-GGC-GGC | CGT-GGA*-GGC | C>A    | L       | M      |
| OGG1 59Z  | BPQ       | 250   | 749  | AGG-CCC-ATC | AGG-CT*C-ATC | C>T    | P       | L      |
| OGG1 60Z  | BPQ       | 245   | 733  | GGC-GGC-ATG | GGC-T*GC-ATG | G>T    | G       | C      |
| OGG1 63ZA | BPQ       | 241   | 722  | AGT-TCC-TGC | AGT-TA*C-TGC | C>A    | S       | Y      |
| OGG1 63ZB | BPQ       | 244   | 732  | ATG-GGC-GGC | ATG-GGA*-GGC | C>A    | G       | G      |

| Colony    | Treatment | Codon | Base | Wild type   | Mutant       | Change | Wild AA | Mut AA |
|-----------|-----------|-------|------|-------------|--------------|--------|---------|--------|
| OGG1 64Z  | BPQ       | 135   | 404  | TTT-TGC-CAA | TTT-TT*C-CAA | G>T    | C       | F      |
| OGG1 65Z  | BPQ       | 250   | 749  | AGG-CCC-ATC | AGG-CT*C-ATC | C>T    | P       | L      |
| OGG1 67ZA | BPQ       | 224   | 672  | CCT-GAG-GTT | CCT-GAT*-GTT | G>T    | E       | D      |
| OGG1 67ZB | BPQ       | 285   | 855  | ACA-GAG-GAA | ACA-GAT*-GAA | G>T    | E       | D      |
| OGG1 67ZC | BPQ       | 251   | 751  | CCC-ATC-CTC | CCC-T*TC-CTC | A>T    | I       | F      |
| OGG1 68Z  | BPQ       | 194   | 580  | CAT-CTT-ATC | CAT-A*TT-ATC | C>A    | L       | I      |
| OGG1 69Z  | BPQ       | 154   | 460  | CCC-GGC-ACC | CCC-T*GC-ACC | G>T    | G       | C      |
| OGG1 71Z  | BPQ       | 273   | 817  | GTG-CGT-GTT | GTG-A*GT-GTT | C>A    | R       | S      |
| OGG1 73ZA | BPQ       | 158   | 473  | GTC-CGC-GCC | GTC-CT*C-GCC | G>T    | R       | L      |
| OGG1 74ZA | BPQ       | 282   | 845  | GAC-CGG-CGC | GAC-CT*G-CGC | G>T    | R       | L      |
| OGG1 74ZB | BPQ       | 293   | 877  | AAA-GGG-GAG | AAA-T*GG-GAG | G>T    | G       | W      |
| OGG1 75Z  | BPQ       | 177   | 529  | TGC-CCC-CAC | TGC-A*CC-CAC | C>A    | P       | T      |
| OGG1 76Z  | BPQ       | 250   | 749  | AGG-CCC-ATC | AGG-CT*C-ATC | C>T    | P       | L      |
| OGG1 78ZA | BPQ       | 195   | 585  | CTT-ATC-CGA | CTT-ATA*-CGA | C>A    | I       | I      |
| OGG1 78ZB | BPQ       | 324   | 972  | CTG-GAT-GGA | CTG-GAA*-GGA | T>A    | D       | E      |
| OGG1 79Z  | BPQ       | 177   | 530  | TGC-CCC-CAC | TGC-CA*C-CAC | C>A    | P       | H      |
