# Supplementary material
Source: PubMed Central journal article supplement (PMC3931135)
Supplement: NIHMS418394-supplement-03.pdf [file NIHMS418394-supplement-03.pdf]

Table S3. Mutations in *p53* treated with benzo[a]pyrene-7,8-dione (BPQ) in *APN1* KO (*apn1*) yeast

| Colony   | Treatment | Codon | Base | Wild type   | Mutant       | Change | Wild AA | Mut AA |
|----------|-----------|-------|------|-------------|--------------|--------|---------|--------|
| APN1 1   | BPQ       | 177   | 530  | GCC-CCC-CAC | GCC-CT*C-CAC | C>T    | P       | L      |
| APN1 2   | BPQ       | 158   | 473  | GTC-CGC-GCC | GTC-CT*C-GCC | G>T    | R       | L      |
| APN1 3   | BPQ       | 145   | 434  | CAG-CTG-TGG | CAG-CC*G-TGG | T>C    | L       | P      |
| APN1 4   | BPQ       | 160   | 479  | GCC-ATG-GCC | GCC-AG*G-GCC | T>G    | M       | R      |
| APN1 6   | BPQ       | 280   | 839  | GGG-AGA-GAC | GGG-AC*A-GAC | G>C    | R       | T      |
| APN1 7   | BPQ       | 250   | 748  | AGG-CCC-ATC | AGG-A*CC-ATC | C>A    | P       | T      |
| APN1 9   | BPQ       | 242   | 725  | TCC-TGC-ATG | TCC-TA*C-ATG | G>A    | C       | Y      |
| APN1 10  | BPQ       | 251   | 751  | CCC-ATC-CTC | CCC-G*TC-CTC | A>G    | I       | V      |
| APN1 11  | BPQ       | 111   | 331  | CGT-CTG-GGC | CGT-A*TG-GGC | C>A    | L       | M      |
| APN1 12  | BPQ       | 176   | 527  | CGC-TGC-CCC | CGC-TT*C-CCC | G>T    | C       | L      |
| APN1 14  | BPQ       | 247   | 739  | ATG-AAC-CGG | ATG-G*AC-CGG | A>G    | N       | D      |
| APN1 15  | BPQ       | 291   | 871  | CGG-AAG-AAA | CGG-G*AG-AAA | A>G    | K       | E      |
| APN1 16  | BPQ       | 242   | 725  | TCC-TGC-ATG | TCC-TA*C-ATG | G>A    | C       | Y      |
| APN1 17  | BPQ       | 175   | 524  | AGG-CGC-TGC | AGG-CA*C-TGC | G>A    | R       | H      |
| APN1 18A | BPQ       | 145   | 435  | CAG-CTG-TGG | CAG-CTC*-TGG | G>C    | L       | L      |
| APN1 18B | BPQ       | 178   | 534  | CCC-CAC-CAT | CCC-CAG*-CAT | C>G    | H       | Q      |
| APN1 19  | BPQ       | 176   | 527  | CGC-TGC-CCC | CGC-TT*C-CCC | G>T    | C       | F      |
| APN1 20  | BPQ       | 176   | 526  | CGC-TGC-CCC | CGC-G*GC-CCC | T>G    | C       | G      |
| APN1 22  | BPQ       | 156   | 467  | ACC-CGC-GTC | ACC-CT*C-GTC | G>T    | R       | L      |
| APN1 23A | BPQ       | 240   | 720  | AAC-AGT-TCC | AAC-AGA*-TCC | T>A    | S       | R      |
| APN1 23B | BPQ       | 273   | 818  | GTG-CGT-GTT | GTG-CT*T-GTT | G>T    | R       | L      |
| APN1 24  | BPQ       | 236   | 708  | AAC-TAC-ATG | AAC-TAA*-ATG | C>A    | Y       | Stop   |
| APN1 25A | BPQ       | 170   | 509  | ATG-ACG-GAG | ATG-AT*G-GAG | C>T    | T       | M      |
| APN1 25B | BPQ       | 218   | 653  | GTC-GTG-CCC | GTG-GC*G-CCC | T>C    | V       | A      |
| APN1 26  | BPQ       | 262   | 785  | AGT-GAT-AAT | AGT-GA*T-AAT | G>A    | G       | D      |
| APN1 27  | BPQ       | 186   | 556  | AGC-GAT-GGT | AGC-T*AT-GGT | G>T    | D       | Y      |
| APN1 28  | BPQ       | 262   | 785  | AGT-GGT-AAT | AGT-GA*T-AAT | G>A    | G       | D      |
| APN1 30A | BPQ       | 170   | 509  | ATG-ACG-GAG | ATG-AT*G-GAG | C>T    | T       | M      |
| APN1 30B | BPQ       | 218   | 653  | TGG-TGC-CCT | TGG-C*GC-CCT | T>C    | V       | A      |
| APN1 31  | BPQ       | 243   | 729  | TGC-ATG-GGC | TGC-ATT*-GGC | G>T    | M       | I      |
| APN1 34  | BPQ       | 317   | 949  | CCC-CAG-CCA | CCC-T*AG-CCA | C>T    | Q       | Stop   |
| APN1 39  | BPQ       | 298   | 892  | CAC-GAG-CTG | CAC-T*AG-CTG | G>T    | E       | Stop   |
| APN1 41  | BPQ       | 389   | 1167 | GAA-GGG-CCT | GAA-GGC*-CCT | G>C    | P       | L      |
| APN1 42  | BPQ       | 250   | 748  | AGG-CCC-ATC | AGG-T*CC-ATC | C>T    | P       | S      |
| APN1 43  | BPQ       | 277   | 830  | GCC-TGT-CCT | GCC-TA*T-CCT | G>A    | C       | Y      |
| APN1 45  | BPQ       | 151   | 452  | ACA-CCC-CCG | ACA-CG*C-CCG | C>G    | P       | R      |
| APN1 49  | BPQ       | 250   | 748  | AGG-CCC-ATC | AGG-T*CC-ATC | C>T    | P       | S      |
| APN1 50  | BPQ       | 389   | 1165 | GAA-GGG-CCT | GAA-T*GG-CCT | G>T    | G       | W      |
| APN1 52  | BPQ       | 277   | 830  | GCC-TGT-CCT | GCC-TA*T-CCT | G>A    | C       | Y      |
